# Supplementary material
Source: HighWire-hosted journal article supplement (https://jitc.bmj.com/content/8/2/e000275)
Supplement: inline-supplementary-material-2 [file inline-supplementary-material-2.pdf]

| CELL LINE | GENE   | MUTATION | CODON     | PROTEIN     | ZYGOSITY |
|-----------|--------|----------|-----------|-------------|----------|
| SK28      | BRAF   | V600E    | c.1799T>A | p.Val600Glu | 100%     |
|           | PTEN   | T167A    | c.499A>G  | p.Thr167Ala | 100%     |
|           | EGFR   | P753S    | c.2257C>T | p.Pro753Ser | 100%     |
| SK28 R    | BRAF   | V600E    | c.1799T>A | p.Val600Glu | 100%     |
|           | PTEN   | T167A    | c.499A>G  | p.Thr167Ala | 100%     |
|           | EGFR   | P753S    | c.2257C>T | p.Pro753Ser | 100%     |
| M14       | BRAF   | V600E    | c.1799T>A | p.Val600Glu | 100%     |
|           | PIK3CA | P539R    | c.1616C>G | p.Pro539Arg | 33%      |
|           | TP53   | G266E    | c.797G>A  | p.Gly266Glu | 76%      |
| M14 R     | BRAF   | V600E    | c.1799T>A | p.Val600Glu | 100%     |
|           | PIK3CA | P539R    | c.1616C>G | p.Pro539Arg | 36%      |
|           | TP53   | G266E    | c.797G>A  | p.Gly266Glu | 69%      |

### Additional file 2: Table S2: Genetic alterations in sensitive and resistant melanoma cell lines

NGS sequencing and Ion AmpliSeq™ Colon and Lung Cancer Research Panel (Life Technologies) was used to detect common mutations in hotspots and targeted regions for 22 known genes associated with tumor tissues.
