# Supplementary material
Source: HighWire-hosted journal article supplement (https://jitc.bmj.com/content/8/2/e000275)
Supplement: inline-supplementary-material-4 [file inline-supplementary-material-4.pdf]

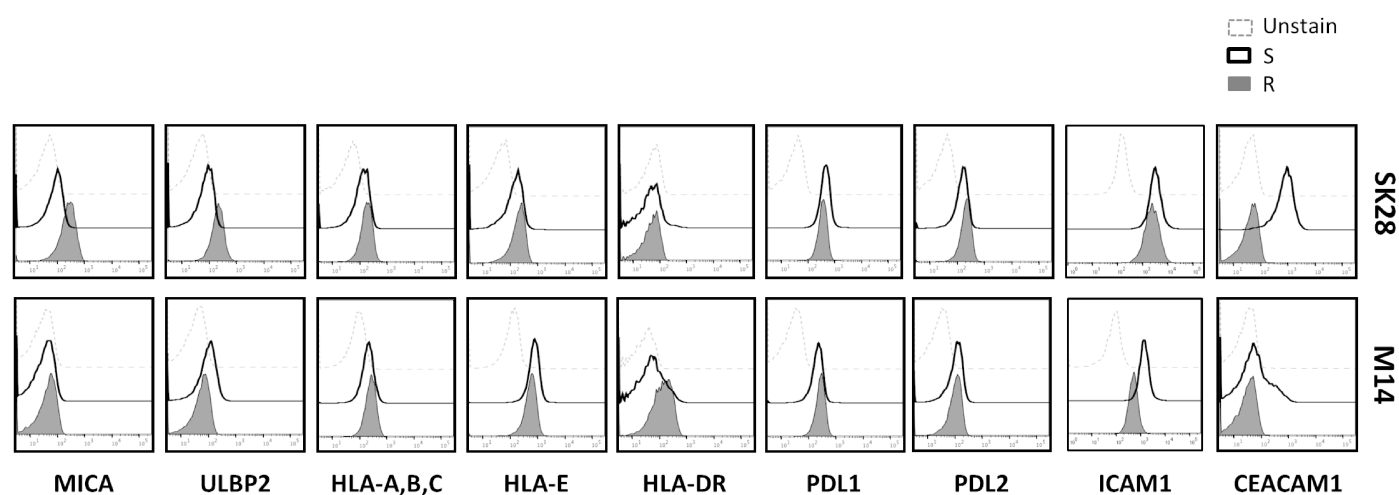

**Additional file 4: Figure S2: Phenotype of S and R melanoma cell lines is associated with increased NK cell activation.** FACS plots of NKG2D and PD-1 ligands, HLA and adhesion molecules (one representative experiment) by S and R cells.
