# Supplementary material
Source: HighWire-hosted journal article supplement (https://jitc.bmj.com/content/8/2/e000275)
Supplement: inline-supplementary-material-5 [file inline-supplementary-material-5.pdf]

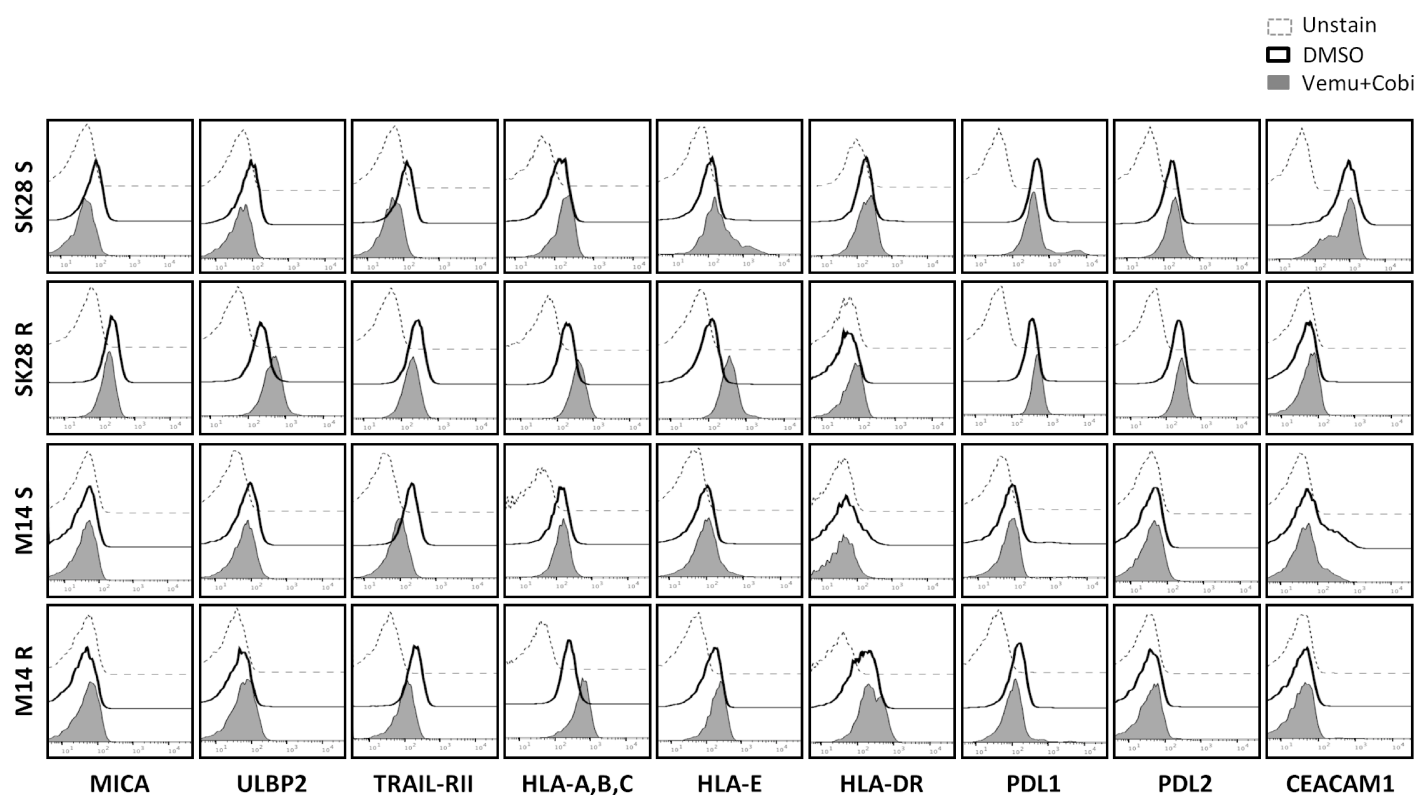

**Additional file 5: Figure S3: Phenotype of S and R cells treated by combined BRAF and MEK inhibitors.** FACS plots from one representative experiment out of 4, showing the expression of ligands involved in NK cell/target interactions was determined in cells treated for 48h in medium containing DMSO (5 $\mu$ M) or vemurafenib (5 $\mu$ M) and cobimetinib (0.5 $\mu$ M).
